# Supplementary material for: Effects of Qi-Fu-Yin on aging of APP/PS1 transgenic mice by regulating the intestinal microbiome
Source: Front Cell Infect Microbiol. 2023 Jan 13;12:1048513. doi: 10.3389/fcimb.2022.1048513 (PMC9880330; doi:10.3389/fcimb.2022.1048513)
Supplement: Supplementary file 2 [file Table_1.xlsx]

## Sheet: CAZy功能注释结果表
Family	Family_description	Class	Class_description
AA1	Laccase / p-diphenol:oxygen oxidoreductase / ferroxidase (EC 1.10.3.2); ; ferroxidase (EC 1.10.3.-); Laccase-like multicopper oxidase (EC 1.10.3.-)	AA	Auxiliary Activities
AA11	AA11 proteins are copper-dependent lytic polysaccharide monooxygenases (LPMOs); cleavage of chitin chains with oxidation of C-1 has been demonstrated for a AA11 LPMO from Aspergillus oryzae;	AA	Auxiliary Activities
AA12	The pyrroloquinoline quinone-dependent oxidoreductase activity was demonstrated for the CC1G_09525 protein of Coprinopsis cinerea.	AA	Auxiliary Activities
AA15	lytic cellulose monooxygenase (C1-hydroxylating) (EC 1.14.99.54); lytic chitin monooxygenase (EC 1.14.99.53)	AA	Auxiliary Activities
AA16	Lytic cellulose monooxygenase (C1-hydroxylating) (EC 1.14.99.54)	AA	Auxiliary Activities
AA2	manganese peroxidase (EC 1.11.1.13); versatile peroxidase (EC 1.11.1.16); lignin peroxidase (EC 1.11.1.14); peroxidase (EC 1.11.1.-)	AA	Auxiliary Activities
AA3	cellobiose dehydrogenase (EC 1.1.99.18); glucose 1-oxidase (EC 1.1.3.4); aryl alcohol oxidase (EC 1.1.3.7); alcohol oxidase (EC 1.1.3.13); pyranose oxidase (EC 1.1.3.10)	AA	Auxiliary Activities
AA3_1	AA3's subfamily	AA	Auxiliary Activities
AA3_2	AA3's subfamily	AA	Auxiliary Activities
AA3_3	AA3's subfamily	AA	Auxiliary Activities
AA3_4	AA3's subfamily	AA	Auxiliary Activities
AA4	vanillyl-alcohol oxidase (EC 1.1.3.38)	AA	Auxiliary Activities
AA5	Oxidase with oxygen as acceptor (EC 1.1.3.-); galactose oxidase (EC 1.1.3.9); glyoxal oxidase (EC 1.2.3.15); alcohol oxidase (EC 1.1.3.13)	AA	Auxiliary Activities
AA5_2	AA5's subfamily	AA	Auxiliary Activities
AA6	1,4-benzoquinone reductase (EC. 1.6.5.6)	AA	Auxiliary Activities
AA7	glucooligosaccharide oxidase (EC 1.1.3.-); chitooligosaccharide oxidase (EC 1.1.3.-)	AA	Auxiliary Activities
AA8	Iron reductase domain	AA	Auxiliary Activities
CBM11	Modules of approx. 180-200 residues. The CBM11 of Clotridium thermocellum Cel26A-Cel5E has been shown to bind both beta-1,4-glucan and beta-1,3-1,4-mixed linked glucans.	CBM	Carbohydrate-Binding Modules
CBM12	Modules of approx. 40-60 residues. The majority of these modules is found among chitinases where the function is chitin-binding. Distantly related to the CBM5 family.	CBM	Carbohydrate-Binding Modules
CBM13	Modules of approx. 150 residues which always appear as a threefold internal repeat. The only apparent exception to this, xylanase II of Actinomadura sp. FC7 (GenBank U08894), is in fact not completely sequenced. These modules were first identified in several plant lectins such as ricin or agglutinin of Ricinus communis which bind galactose residues. The three-dimensional structure of a plant lect…	CBM	Carbohydrate-Binding Modules
CBM16	Carbohydrate-binding module 16. Binding to cellulose and glucomannan demonstrated [B. Bae et al (2008) J Biol Chem. 283:12415-25 (PMID: 18025086)]	CBM	Carbohydrate-Binding Modules
CBM18	Modules of approx. 40 residues. The chitin-binding function has been demonstrated in many cases. These modules are found attached to a number of chitinase catalytic domains, but also in non-catalytic proteins either in isolation or as multiple repeats.	CBM	Carbohydrate-Binding Modules
CBM2	Modules of approx. 100 residues and which are found in a large number of bacterial enzymes. The cellulose-binding function has been demonstrated in many cases. Several of these modules have been shown to also bind chitin or xylan.	CBM	Carbohydrate-Binding Modules
CBM20	The granular starch-binding function has been demonstrated in several cases. Interact strongly with cyclodextrins. Often designated as starch-binding domains (SBD).	CBM	Carbohydrate-Binding Modules
CBM21	Modules of approx. 100 residues. The granular starch-binding function has been demonstrated in one case. Sometimes designated as starch-binding domains (SBD).	CBM	Carbohydrate-Binding Modules
CBM22	A xylan binding function has been demonstrated in several cases and affinity with mixed beta-1,3/beta-1,4-glucans in one. In several cases a thermostabilizing effect has also been seen.	CBM	Carbohydrate-Binding Modules
CBM23	Mannan-binding function demonstrated in one case.	CBM	Carbohydrate-Binding Modules
CBM25	Starch-binding function demonstrated in one case.	CBM	Carbohydrate-Binding Modules
CBM26	Starch-binding function demonstrated in two cases.	CBM	Carbohydrate-Binding Modules
CBM27	Mannan-binding function demonstrated in two cases	CBM	Carbohydrate-Binding Modules
CBM28	The module from the endo-1,4-glucanase of Bacillus sp. 1139 binds to non-crystalline cellulose, cellooligosaccharides, and beta-(1,3)(1,4)-glucans	CBM	Carbohydrate-Binding Modules
CBM30	Binding to cellulose has been demonstrated for the N-terminal module of Fibrobacter succinogenes CelF.	CBM	Carbohydrate-Binding Modules
CBM32	Binding to galactose and lactose has been demonstrated for the module of Micromonospora viridifaciens sialidase (PMID: 16239725). Binding to polygalacturonic acid has been shown for a Yersinia member (PMID: 17292916). Binding to LacNAc (beta-D-galactosyl-1,4-beta-D-N-acetylglucosamine) has been shown for an N-acetylglucosaminidase from Clostridium perfingens (PMID: 16990278).	CBM	Carbohydrate-Binding Modules
CBM34	Modules of approx. 120 residues. Granular starch-binding function has been demonstrated in the case of Thermoactinomyces vulgaris R-47 -amylase 1 (TVAI).	CBM	Carbohydrate-Binding Modules
CBM35	Modules of approx. 130 residues. A module that is conserved in three Cellvibrio xylan-degrading enzymes binds to xylan and the interaction is calcium dependent, while a module from a Cellvibrio mannanase binds to decorated soluble mannans and mannooligosaccharides. A module in a	CBM	Carbohydrate-Binding Modules
CBM37	Modules of approx. 100 residues, conserved in numerous R. albus polysaccharide-degrading enzymes and other proteins from this bacterium. Several members of CBM37 have been shown to exhibit rather broad binding specificity to xylan, chitin, microcrystalline and phosphoric-acid swollen cellulose, as well as more heterogeneous substrates, such as alfalfa cell walls, banana stem and wheat straw.	CBM	Carbohydrate-Binding Modules
CBM38	The inulin-binding function has been demonstrated in the case of the cycloinulo-oligosaccharide fructanotransferase from Paenibacillus macerans (Bacillus macerans) by Lee et al. (2004) FEMS Microbiol Lett 234:105-10. (PMID:15109727).	CBM	Carbohydrate-Binding Modules
CBM4	Modules of approx. 150 residues found in bacterial enzymes. Binding of these modules has been demonstrated with xylan, beta-1,3-glucan, beta-1,3-1,4-glucan, beta-1,6-glucan and amorphous cellulose but not with crystalline cellulose.	CBM	Carbohydrate-Binding Modules
CBM40	Modules of approx. 200 residues, found at the N-terminus of GH33 sialidases. Can also be found inserted in the beta-propeller of GH33 sialidases. The sialic acid binding function has been demonstrated for the N-terminal CBM40 of Vibrio cholerae sialidase (Moustafa et al. (2004) J Biol Chem 279:40819-26) (PMID: 15226294).	CBM	Carbohydrate-Binding Modules
CBM41	Modules of approx. 100 residues found in primarily in bacterial pullulanases. The N-terminal module from Thermotoga maritima Pul13 has been shown to bind to the alpha-glucans amylose, amylopectin, pullulan, and oligosaccharide fragments derived from these polysaccharides (Lammerts van Bueren et al. (2004) Biochemistry 43:15633-42) (PMID: 15581376).	CBM	Carbohydrate-Binding Modules
CBM42	Modules of approx. 160 residues found mostly at the C-terminus of GH54 catalytic domains. Binding to arabinofuranose (present in arabinoxylan) has been demonstrated.	CBM	Carbohydrate-Binding Modules
CBM44	The C-terminal CBM44 module of the Clostridium thermocellum enzyme has been demonstrated to bind equally well cellulose and xyloglucan	CBM	Carbohydrate-Binding Modules
CBM46	Modules of approx. 100 residues, found at the C-terminus of several GH5 cellulases. Cellulose-binding function demonstrated in one case.	CBM	Carbohydrate-Binding Modules
CBM47	Modules of approx 150 residues. Fucose-binding activity demonstrated	CBM	Carbohydrate-Binding Modules
CBM48	Modules of approx. 100 residues with glycogen-binding function, appended to GH13 modules. Also found in the beta subunit (glycogen-binding) of AMP-activated protein kinases (AMPK)	CBM	Carbohydrate-Binding Modules
CBM5	Modules of approx. 60 residues found in bacterial enzymes. Chitin-binding described in several cases. Distantly related to the CBM12 family.	CBM	Carbohydrate-Binding Modules
CBM50	Modules of approx. 50 residues found attached to various enzymes from families GH18, GH19, GH23, GH24, GH25 and GH73, i.e. enzymes cleaving either chitin or peptidoglycan. Binding to chitopentaose demonstrated in the case of Pteris ryukyuensis chitinase A [Ohnuma T et al. (2008) J. Biol. Chem. 283:5178-87 (PMID: 18083709)]. CBM50 modules are also found in a multitude of other enzymes targeting th…	CBM	Carbohydrate-Binding Modules
CBM51	Modules of approx. 150 residues found attached to various enzymes from families GH2, GH27, GH31, GH95, GH98 and GH101 . Binding to galactose and to blood group A/B-antigens demonstrated in the case of C. perfringens GH95CBM51 and GH98CBM51 respectively [Gregg KJ et al. (2008) J. Biol. Chem. 283:12604-13 PMID: 18292090].	CBM	Carbohydrate-Binding Modules
CBM54	Binding to xylan, yeast cell wall glucan and chitin shown in Dvortsov et al., Microbiology UK (2009) in press.	CBM	Carbohydrate-Binding Modules
CBM56	beta-1,3-glucan binding function demonstrated by Yamamoto et al. (1998) FEBS Letters 433:41-43 [PMID: 9738929]	CBM	Carbohydrate-Binding Modules
CBM57	Created from reading Schallus et al (2008) Mol Biol Cell. 19:3404-3414 [PMID: 18524852] and finding related domains attached to various glycosidases.	CBM	Carbohydrate-Binding Modules
CBM6	Modules of approx. 120 residues. The cellulose-binding function has been demonstrated in one case on amorphous cellulose and beta-1,4-xylan. Some of these modules also bind beta-1,3-glucan, beta-1,3-1,4-glucan, and beta-1,4-glucan.	CBM	Carbohydrate-Binding Modules
CBM61	Modules of approx. 150 residues found appended to GH16, GH30, GH31, GH43, GH53 and GH66 catalytic domains. A beta-1,4-galactan binding function has been demonstrated for the CBM61 of Thermotoga maritima GH53 galactanase [PMID: 20826814].	CBM	Carbohydrate-Binding Modules
CBM62	The CBM62 module of Clostridium thermocellum Cthe_2193 protein binds galactose moieties found on xyloglucan, arabinogalactan and galactomannan.	CBM	Carbohydrate-Binding Modules
CBM65	CBM65A and CBM65B, derived from Eubacterium cellulosolvens endoglucanase EcCel5A, bind to a range of beta-glucans but, uniquely, display significant preference for xyloglucan	CBM	Carbohydrate-Binding Modules
CBM66	The CBM66 module, derived from the Bacillus subtilis exo-acting beta-fructosidase SacC, targets the terminal fructoside residue of fructans.	CBM	Carbohydrate-Binding Modules
CBM67	Fujimoto et al. [PMID : 23486481] disclosed the L-rhamnose binding activity and 3-D structure of the CBM67 of Streptomyces avermitilis alpha-L-rhamnosidase (SaRha78A);	CBM	Carbohydrate-Binding Modules
CBM68	Binding to maltotriose and maltotetraose shown for the pullulanase of Anoxybacillus sp. LM18-11. Binding function derived from crystal structure and deletion of the CBM, which showed reduced specific activity and increased Km value compared to the wild type enzyme.	CBM	Carbohydrate-Binding Modules
CBM69	starch-binding function demonstrated in one case; distantly related to families CBM20 and CBM48	CBM	Carbohydrate-Binding Modules
CBM70	The hyaluronan-specific binding function of the N-terminal CBM70 module of Streptococcus pneumoniae hyaluronate lyase has been demonstrated.	CBM	Carbohydrate-Binding Modules
CBM71	The two CBM71s of S. pneumoniae BgaA bind lactose and LacNAc.	CBM	Carbohydrate-Binding Modules
CBM72	Modules of 130-180 residues found at the C-terminus glycoside hydrolases from various families, sometimes as tandem repeats. The CBM72 found on an endoglucanase from an uncultivated microorganism was found to bind a broad spectrum of polysaccharides including soluble and insoluble cellulose, beta-1,3/1,4-mixed linked glucans, xylan, and beta-mannan [PMID=26765840].	CBM	Carbohydrate-Binding Modules
CBM74	Modules of approx. 300 residues appended to several alpha-amylases. The starch-binding function has been demonstrated for the CBM74 appended to the GH13 alpha-amylase of Microbacterium aureum B8.A	CBM	Carbohydrate-Binding Modules
CBM75	Modules of 290 residues appended to GH43_16 enzymes. So far found exclusively in Ruminococci. The xyloglucan-binding function was demonstrated for the R. flavefaciens protein.	CBM	Carbohydrate-Binding Modules
CBM77	Pectin binding modules of approx. 110 residues. The Ruminococcus flavefaciens CBM77 was shown to bind various pectins of low degree of esterification.	CBM	Carbohydrate-Binding Modules
CBM78	Modules of approx. 150 residues appended to the C-terminus of GH5 and GH26 enzymes. So far found exclusively in Ruminococcal enzymes. The R. flavefaciens module has been shown to bind decorated beta-1,4-glucans with a preference for xyloglucan.	CBM	Carbohydrate-Binding Modules
CBM79	Modules of approx. 130 residues found so far only in ruminococcal proteins. Binding to various beta-glucans was shown for the R. flavefaciens GH9 enzyme.	CBM	Carbohydrate-Binding Modules
CBM8	The cellulose-binding module from a cellulase of the slime mold Dictyostelium discoideum has been experimentally shown to bind cellulose.	CBM	Carbohydrate-Binding Modules
CBM84	Modules of approx. 140 aminoacids appended to enzymes of different families of CAZymes. A xanthan-binding function was reported for the GH9 xanthanase of Paenibacillus nanensis by Moroz et al. ACS Catal., 2018, 8 (7), pp 6021-6034.	CBM	Carbohydrate-Binding Modules
CBM9	Modules of approx. 170 residues found so far only in xylanases. The cellulose-binding function has been demonstrated in one case.	CBM	Carbohydrate-Binding Modules
CE1	acetyl xylan esterase (EC 3.1.1.72); cinnamoyl esterase (EC 3.1.1.-); feruloyl esterase (EC 3.1.1.73); carboxylesterase (EC 3.1.1.1); S-formylglutathione hydrolase (EC 3.1.2.12); diacylglycerol O-acyltransferase (EC 2.3.1.20); trehalose 6-O-mycolyltransferase (EC 2.3.1.122)	CE	Carbohydrate Esterases
CE10	arylesterase (EC 3.1.1.-); carboxyl esterase (EC 3.1.1.3); acetylcholinesterase (EC 3.1.1.7); cholinesterase (EC 3.1.1.8); sterol esterase (EC 3.1.1.13); brefeldin A esterase (EC 3.1.1.-).	CE	Carbohydrate Esterases
CE11	UDP-3-0-acyl N-acetylglucosamine deacetylase (EC 3.5.1.108).	CE	Carbohydrate Esterases
CE12	pectin acetylesterase (EC 3.1.1.-); rhamnogalacturonan acetylesterase (EC 3.1.1.-); acetyl xylan esterase (EC 3.1.1.72)	CE	Carbohydrate Esterases
CE13	pectin acetylesterase (EC 3.1.1.-)	CE	Carbohydrate Esterases
CE14	N-acetyl-1-D-myo-inosityl-2-amino-2-deoxy-alpha-D-glucopyranoside deacetylase (EC 3.5.1.89); diacetylchitobiose deacetylase (EC 3.5.1.-); mycothiol S-conjugate amidase (EC 3.5.1.-)	CE	Carbohydrate Esterases
CE15	4-O-methyl-glucuronoyl methylesterase (EC 3.1.1.-)	CE	Carbohydrate Esterases
CE16	acetylesterase (EC 3.1.1.6) active on various carbohydrate acetyl esters	CE	Carbohydrate Esterases
CE2	acetyl xylan esterase (EC 3.1.1.72).	CE	Carbohydrate Esterases
CE3	acetyl xylan esterase (EC 3.1.1.72).	CE	Carbohydrate Esterases
CE4	acetyl xylan esterase (EC 3.1.1.72); chitin deacetylase (EC 3.5.1.41); chitooligosaccharide deacetylase (EC 3.5.1.-); peptidoglycan GlcNAc deacetylase (EC 3.5.1.-); peptidoglycan N-acetylmuramic acid deacetylase (EC 3.5.1.-).	CE	Carbohydrate Esterases
CE5	acetyl xylan esterase (EC 3.1.1.72); cutinase (EC 3.1.1.74)	CE	Carbohydrate Esterases
CE6	acetyl xylan esterase (EC 3.1.1.72).	CE	Carbohydrate Esterases
CE7	acetyl xylan esterase (EC 3.1.1.72); cephalosporin-C deacetylase (EC 3.1.1.41).	CE	Carbohydrate Esterases
CE8	pectin methylesterase (EC 3.1.1.11).	CE	Carbohydrate Esterases
CE9	N-acetylglucosamine 6-phosphate deacetylase (EC 3.5.1.25); N-acetylglucosamine 6-phosphate deacetylase (EC 3.5.1.80)	CE	Carbohydrate Esterases
GH1	beta-glucosidase (EC 3.2.1.21); beta-galactosidase (EC 3.2.1.23); beta-mannosidase (EC 3.2.1.25); beta-glucuronidase (EC 3.2.1.31); beta-xylosidase (EC 3.2.1.37); beta-D-fucosidase (EC 3.2.1.38); phlorizin hydrolase (EC 3.2.1.62); exo-beta-1,4-glucanase (EC 3.2.1.74); 6-phospho-beta-galactosidase (EC 3.2.1.85); 6-phospho-beta-glucosidase (EC 3.2.1.86); strictosidine beta-glucosidase (EC 3.2.1.105…	GH	Glycoside Hydrolases
GH10	endo-1,4-beta-xylanase (EC 3.2.1.8); endo-1,3-beta-xylanase (EC 3.2.1.32); tomatinase (EC 3.2.1.-); xylan endotransglycosylase (EC 2.4.2.-); endo-beta-1,4-glucanase (EC 3.2.1.4)	GH	Glycoside Hydrolases
GH100	alkaline and neutral invertase (EC 3.2.1.26)	GH	Glycoside Hydrolases
GH101	endo-alpha-N-acetylgalactosaminidase (EC 3.2.1.97)	GH	Glycoside Hydrolases
GH102	peptidoglycan lytic transglycosylase (EC 3.2.1.-)	GH	Glycoside Hydrolases
GH103	peptidoglycan lytic transglycosylase (EC 3.2.1.-)	GH	Glycoside Hydrolases
GH104	peptidoglycan lytic transglycosylase (EC 3.2.1.-)	GH	Glycoside Hydrolases
GH105	unsaturated rhamnogalacturonyl hydrolase (EC 3.2.1.172); d-4,5-unsaturated beta-glucuronyl hydrolase (EC 3.2.1.-); d-4,5-unsaturated alpha-galacturonidase (EC 3.2.1.-)	GH	Glycoside Hydrolases
GH106	alpha-L-rhamnosidase (EC 3.2.1.40); rhamnogalacturonan alpha-L-rhamnohydrolase (EC 3.2.1.174)	GH	Glycoside Hydrolases
GH108	N-acetylmuramidase (EC 3.2.1.17)	GH	Glycoside Hydrolases
GH109	alpha-N-acetylgalactosaminidase (EC 3.2.1.49)	GH	Glycoside Hydrolases
GH11	endo-beta-1,4-xylanase (EC 3.2.1.8); endo-beta-1,3-xylanase (EC 3.2.1.32)	GH	Glycoside Hydrolases
GH110	alpha-galactosidase (EC 3.2.1.22); alpha-1,3-galactosidase (EC 3.2.1.-)	GH	Glycoside Hydrolases
GH111	keratan sulfate hydrolase (endo-beta-N-acetylglucosaminidase) (EC 3.2.1.-)	GH	Glycoside Hydrolases
GH112	lacto-N-biose phosphorylase or galacto-N-biose phosphorylase (EC 2.4.1.211); D-galactosyl-beta-1,4-L-rhamnose phosphorylase (EC 2.4.1.247); galacto-N-biose/lacto-N-biose phosphorylase (EC 2.4.1.-)	GH	Glycoside Hydrolases
GH113	beta-mannanase (EC 3.2.1.78)	GH	Glycoside Hydrolases
GH114	endo-alpha-1,4-polygalactosaminidase (EC 3.2.1.109)	GH	Glycoside Hydrolases
GH115	xylan alpha-1,2-glucuronidase (3.2.1.131); alpha-(4-O-methyl)-glucuronidase (3.2.1.-)	GH	Glycoside Hydrolases
GH116	beta-glucosidase (EC 3.2.1.21); beta-xylosidase (EC 3.2.1.37); acid beta-glucosidase/beta-glucosylceramidase (EC 3.2.1.45); beta-N-acetylglucosaminidase (EC 3.2.1.52)	GH	Glycoside Hydrolases
GH117	alpha-1,3-L-neoagarooligosaccharide hydrolase (EC 3.2.1.-); alpha-1,3-L-neoagarobiase / neoagarobiose hydrolase (EC 3.2.1.-)	GH	Glycoside Hydrolases
GH119	alpha-amylase (EC 3.2.1.1)	GH	Glycoside Hydrolases
GH120	beta-xylosidase (EC 3.2.1.37)	GH	Glycoside Hydrolases
GH121	beta-L-arabinobiosidase (EC 3.2.1.-)	GH	Glycoside Hydrolases
GH123	beta-N-acetylgalactosaminidase (EC 3.2.1.53); glycosphingolipid beta-N-acetylgalactosaminidase (EC 3.2.1.-)	GH	Glycoside Hydrolases
GH124	endoglucanase (EC 3.2.1.4)	GH	Glycoside Hydrolases
GH125	exo-alpha-1,6-mannosidase (EC 3.2.1.-)	GH	Glycoside Hydrolases
GH126	alpha-amylase (EC 3.2.1.-)	GH	Glycoside Hydrolases
GH127	beta-L-arabinofuranosidase (EC 3.2.1.185); 3-C-carboxy-5-deoxy-L-xylose (aceric acid) hydrolase (EC 3.2.1.-)	GH	Glycoside Hydrolases
GH128	beta-1,3-glucanase (EC 3.2.1.39)	GH	Glycoside Hydrolases
GH129	alpha-N-acetylgalactosaminidase (EC 3.2.1.49);	GH	Glycoside Hydrolases
GH13	alpha-amylase (EC 3.2.1.1); pullulanase (EC 3.2.1.41); cyclomaltodextrin glucanotransferase (EC 2.4.1.19); cyclomaltodextrinase (EC 3.2.1.54); trehalose-6-phosphate hydrolase (EC 3.2.1.93); oligo-alpha-glucosidase (EC 3.2.1.10); maltogenic amylase (EC 3.2.1.133); neopullulanase (EC 3.2.1.135); alpha-glucosidase (EC 3.2.1.20); maltotetraose-forming alpha-amylase (EC 3.2.1.60); isoamylase (EC 3.2.1…	GH	Glycoside Hydrolases
GH130	beta-1,4-mannosylglucose phosphorylase (EC 2.4.1.281); beta-1,4-mannooligosaccharide phosphorylase (EC 2.4.1.319); beta-1,4-mannosyl-N-acetyl-glucosamine phosphorylase (EC 2.4.1.320); beta-1,2-mannobiose phosphorylase (EC 2.4.1.-); beta-1,2-oligomannan phosphorylase (EC 2.4.1.-); beta-1,2-mannosidase (EC 3.2.1.-)	GH	Glycoside Hydrolases
GH133	amylo-alpha-1,6-glucosidase (EC 3.2.1.33);	GH	Glycoside Hydrolases
GH136	lacto-N-biosidase (EC 3.2.1.140)	GH	Glycoside Hydrolases
GH137	beta-L-arabinofuranosidase (EC 3.2.1.185)	GH	Glycoside Hydrolases
GH138	alpha-galacturonidase (EC 3.2.1.-)	GH	Glycoside Hydrolases
GH139	alpha-2-O-Me-L-fucosidase (EC 3.2.1.-)	GH	Glycoside Hydrolases
GH13_1	GH13's subfamily	GH	Glycoside Hydrolases
GH13_10	GH13's subfamily	GH	Glycoside Hydrolases
GH13_11	GH13's subfamily	GH	Glycoside Hydrolases
GH13_12	GH13's subfamily	GH	Glycoside Hydrolases
GH13_13	GH13's subfamily	GH	Glycoside Hydrolases
GH13_14	GH13's subfamily	GH	Glycoside Hydrolases
GH13_16	GH13's subfamily	GH	Glycoside Hydrolases
GH13_18	GH13's subfamily	GH	Glycoside Hydrolases
GH13_19	GH13's subfamily	GH	Glycoside Hydrolases
GH13_2	GH13's subfamily	GH	Glycoside Hydrolases
GH13_20	GH13's subfamily	GH	Glycoside Hydrolases
GH13_21	GH13's subfamily	GH	Glycoside Hydrolases
GH13_23	GH13's subfamily	GH	Glycoside Hydrolases
GH13_24	GH13's subfamily	GH	Glycoside Hydrolases
GH13_25	GH13's subfamily	GH	Glycoside Hydrolases
GH13_26	GH13's subfamily	GH	Glycoside Hydrolases
GH13_28	GH13's subfamily	GH	Glycoside Hydrolases
GH13_29	GH13's subfamily	GH	Glycoside Hydrolases
GH13_3	GH13's subfamily	GH	Glycoside Hydrolases
GH13_30	GH13's subfamily	GH	Glycoside Hydrolases
GH13_31	GH13's subfamily	GH	Glycoside Hydrolases
GH13_32	GH13's subfamily	GH	Glycoside Hydrolases
GH13_33	GH13's subfamily	GH	Glycoside Hydrolases
GH13_34	GH13's subfamily	GH	Glycoside Hydrolases
GH13_35	GH13's subfamily	GH	Glycoside Hydrolases
GH13_36	GH13's subfamily	GH	Glycoside Hydrolases
GH13_37	GH13's subfamily	GH	Glycoside Hydrolases
GH13_38	GH13's subfamily	GH	Glycoside Hydrolases
GH13_39	GH13's subfamily	GH	Glycoside Hydrolases
GH13_4	GH13's subfamily	GH	Glycoside Hydrolases
GH13_40	GH13's subfamily	GH	Glycoside Hydrolases
GH13_41	GH13's subfamily	GH	Glycoside Hydrolases
GH13_42	GH13's subfamily	GH	Glycoside Hydrolases
GH13_5	GH13's subfamily	GH	Glycoside Hydrolases
GH13_6	GH13's subfamily	GH	Glycoside Hydrolases
GH13_7	GH13's subfamily	GH	Glycoside Hydrolases
GH13_8	GH13's subfamily	GH	Glycoside Hydrolases
GH13_9	GH13's subfamily	GH	Glycoside Hydrolases
GH14	beta-amylase (EC 3.2.1.2)	GH	Glycoside Hydrolases
GH140	apiosidase (EC 3.2.1.-)	GH	Glycoside Hydrolases
GH141	alpha-L-fucosidase (EC 3.2.1.51); xylanase (EC 3.2.1.8)	GH	Glycoside Hydrolases
GH142	beta-L-arabinofuranosidase (EC 3.2.1.185)	GH	Glycoside Hydrolases
GH143	2-keto-3-deoxy-D-lyxo-heptulosaric acid hydrolase (EC 3.2.1.-)	GH	Glycoside Hydrolases
GH144	endo-beta-1,2-glucanase (EC 3.2.1.71); beta-1,2-glucooligosaccharide sophorohydrolase (EC 3.2.1.-)	GH	Glycoside Hydrolases
GH145	L-Rhalpha-alpha-1,4-GlcA alpha-L-rhamnohydrolase (EC 3.2.1.-)	GH	Glycoside Hydrolases
GH146	beta-L-arabinofuranosidase (EC 3.2.1.185)	GH	Glycoside Hydrolases
GH147	beta-galactosidase (EC 3.2.1.23)	GH	Glycoside Hydrolases
GH148	beta-1,3-glucanase (EC 3.2.1.-)	GH	Glycoside Hydrolases
GH149	beta-1,3-glucan phosphorylase (EC 2.4.1.-)	GH	Glycoside Hydrolases
GH15	glucoamylase (EC 3.2.1.3); glucodextranase (EC 3.2.1.70); alpha,alpha-trehalase (EC 3.2.1.28); dextran dextrinase (EC 2.4.1.2)	GH	Glycoside Hydrolases
GH150	l-carrageenase (EC 3.2.1.-)	GH	Glycoside Hydrolases
GH151	alpha-L-fucosidase (EC 3.2.1.51)	GH	Glycoside Hydrolases
GH153	poly-beta-1,6-D-glucosamine hydrolase (EC 3.2.1.-)	GH	Glycoside Hydrolases
GH154	beta-glucuronidase (3.2.1.31)	GH	Glycoside Hydrolases
GH156	exo-alpha-sialidase (EC 3.2.1.18);	GH	Glycoside Hydrolases
GH158	endo-beta-1,3-glucanase (EC 3.2.1.39)	GH	Glycoside Hydrolases
GH159	beta-D-galactofuranosidase (EC 3.2.1.146)	GH	Glycoside Hydrolases
GH16	xyloglucan:xyloglucosyltransferase (EC 2.4.1.207); keratan-sulfate endo-1,4-beta-galactosidase (EC 3.2.1.103); endo-1,3-beta-glucanase / laminarinase (EC 3.2.1.39); endo-1,3(4)-beta-glucanase (EC 3.2.1.6); licheninase (EC 3.2.1.73); beta-agarase (EC 3.2.1.81); kappa;-carrageenase (EC 3.2.1.83); xyloglucanase (EC 3.2.1.151); endo-beta-1,3-galactanase (EC 3.2.1.181); [retaining] beta-porphyranase (…	GH	Glycoside Hydrolases
GH161	beta-1,3-glucan phosphorylase (EC 2.4.1.-)	GH	Glycoside Hydrolases
GH163	endo-beta-N-acetylglucosaminidase cleaving GlcNAc-beta-1,2-Man (EC 3.2.1.-)	GH	Glycoside Hydrolases
GH164	beta-mannosidase (EC 3.2.1.25); beta-mannosidase (EC 3.2.1.25)	GH	Glycoside Hydrolases
GH165	beta-galactosidase (EC 3.2.1.23)	GH	Glycoside Hydrolases
GH17	glucan endo-1,3-beta-glucosidase (EC 3.2.1.39); glucan 1,3-beta-glucosidase (EC 3.2.1.58); licheninase (EC 3.2.1.73); ABA-specific beta-glucosidase (EC 3.2.1.175); beta-1,3-glucanosyltransglycosylase (EC 2.4.1.-)	GH	Glycoside Hydrolases
GH18	chitinase (EC 3.2.1.14); lysozyme (EC 3.2.1.17); endo-beta-N-acetylglucosaminidase (EC 3.2.1.96); peptidoglycan hydrolase with endo-beta-N-acetylglucosaminidase specificity (EC 3.2.1.-); Nod factor hydrolase (EC 3.2.1.-); xylanase inhibitor; concanavalin B; narbonin	GH	Glycoside Hydrolases
GH19	chitinase (EC 3.2.1.14); lysozyme (EC 3.2.1.17)	GH	Glycoside Hydrolases
GH2	beta-galactosidase (EC 3.2.1.23) ; beta-mannosidase (EC 3.2.1.25); beta-glucuronidase (EC 3.2.1.31); alpha-L-arabinofuranosidase (EC 3.2.1.55); mannosylglycoprotein endo-beta-mannosidase (EC 3.2.1.152); exo-beta-glucosaminidase (EC 3.2.1.165); alpha-L-arabinopyranosidase (EC 3.2.1.-); beta-galacturonidase (EC 3.2.1.-); beta-xylosidase (EC 3.2.1.37); beta-D-galactofuranosidase (EC 3.2.1.146);	GH	Glycoside Hydrolases
GH20	beta-hexosaminidase (EC 3.2.1.52); lacto-N-biosidase (EC 3.2.1.140); beta-1,6-N-acetylglucosaminidase (EC 3.2.1.-); beta-6-SO3-N-acetylglucosaminidase (EC 3.2.1.-)	GH	Glycoside Hydrolases
GH22	lysozyme type C (EC 3.2.1.17); lysozyme type i (EC 3.2.1.17); alpha-lactalbumin	GH	Glycoside Hydrolases
GH23	lysozyme type G (EC 3.2.1.17); peptidoglycan lyase (EC 4.2.2.n1) also known in the literature as peptidoglycan lytic transglycosylase; chitinase (EC 3.2.1.14)	GH	Glycoside Hydrolases
GH24	lysozyme (EC 3.2.1.17)	GH	Glycoside Hydrolases
GH25	lysozyme (EC 3.2.1.17)	GH	Glycoside Hydrolases
GH26	beta-mannanase (EC 3.2.1.78); exo-beta-1,4-mannobiohydrolase (EC 3.2.1.100); beta-1,3-xylanase (EC 3.2.1.32); lichenase / endo-beta-1,3-1,4-glucanase (EC 3.2.1.73); mannobiose-producing exo-beta-mannanase (EC 3.2.1.-)	GH	Glycoside Hydrolases
GH27	alpha-galactosidase (EC 3.2.1.22); alpha-N-acetylgalactosaminidase (EC 3.2.1.49); isomalto-dextranase (EC 3.2.1.94); beta-L-arabinopyranosidase (EC 3.2.1.88); galactan:galactan galactosyltransferase (EC 2.4.1.-)	GH	Glycoside Hydrolases
GH28	polygalacturonase (EC 3.2.1.15); alpha-L-rhamnosidase (EC 3.2.1.40); exo-polygalacturonase (EC 3.2.1.67); exo-polygalacturonosidase (EC 3.2.1.82); rhamnogalacturonase (EC 3.2.1.171); rhamnogalacturonan alpha-1,2-galacturonohydrolase (EC 3.2.1.173); endo-xylogalacturonan hydrolase (EC 3.2.1.-)	GH	Glycoside Hydrolases
GH29	alpha-L-fucosidase (EC 3.2.1.51); alpha-1,3/1,4-L-fucosidase (EC 3.2.1.111)	GH	Glycoside Hydrolases
GH3	beta-glucosidase (EC 3.2.1.21); xylan 1,4-beta-xylosidase (EC 3.2.1.37); beta-glucosylceramidase (EC 3.2.1.45); beta-N-acetylhexosaminidase (EC 3.2.1.52); alpha-L-arabinofuranosidase (EC 3.2.1.55); glucan 1,3-beta-glucosidase (EC 3.2.1.58); glucan 1,4-beta-glucosidase (EC 3.2.1.74); isoprimeverose-producing oligoxyloglucan hydrolase (EC 3.2.1.120); coniferin beta-glucosidase (EC 3.2.1.126); exo-1…	GH	Glycoside Hydrolases
GH30	endo-beta-1,4-xylanase (EC 3.2.1.8); beta-glucosidase (3.2.1.21); beta-glucuronidase (EC 3.2.1.31); beta-xylosidase (EC 3.2.1.37); beta-fucosidase (EC 3.2.1.38); glucosylceramidase (EC 3.2.1.45); beta-1,6-glucanase (EC 3.2.1.75); glucuronoarabinoxylan endo-beta-1,4-xylanase (EC 3.2.1.136); endo-beta-1,6-galactanase (EC:3.2.1.164); [reducing end] beta-xylosidase (EC 3.2.1.-)	GH	Glycoside Hydrolases
GH30_1	GH30's subfamily	GH	Glycoside Hydrolases
GH30_2	GH30's subfamily	GH	Glycoside Hydrolases
GH30_3	GH30's subfamily	GH	Glycoside Hydrolases
GH30_4	GH30's subfamily	GH	Glycoside Hydrolases
GH30_5	GH30's subfamily	GH	Glycoside Hydrolases
GH30_6	GH30's subfamily	GH	Glycoside Hydrolases
GH30_8	GH30's subfamily	GH	Glycoside Hydrolases
GH31	alpha-glucosidase (EC 3.2.1.20); alpha-galactosidase (EC 3.2.1.22); alpha-mannosidase (EC 3.2.1.24); alpha-1,3-glucosidase (EC 3.2.1.84); sucrase-isomaltase (EC 3.2.1.48) (EC 3.2.1.10); alpha-xylosidase (EC 3.2.1.177); alpha-glucan lyase (EC 4.2.2.13); isomaltosyltransferase (EC 2.4.1.-); oligosaccharide alpha-1,4-glucosyltransferase (EC 2.4.1.161); sulfoquinovosidase (EC 3.2.1.-)	GH	Glycoside Hydrolases
GH32	invertase (EC 3.2.1.26); endo-inulinase (EC 3.2.1.7); beta-2,6-fructan 6-levanbiohydrolase (EC 3.2.1.64); endo-levanase (EC 3.2.1.65); exo-inulinase (EC 3.2.1.80); fructan beta-(2,1)-fructosidase/1-exohydrolase (EC 3.2.1.153); fructan beta-(2,6)-fructosidase/6-exohydrolase (EC 3.2.1.154); sucrose:sucrose 1-fructosyltransferase (EC 2.4.1.99); fructan:fructan 1-fructosyltransferase (EC 2.4.1.100); …	GH	Glycoside Hydrolases
GH33	sialidase or neuraminidase (EC 3.2.1.18); trans-sialidase (EC 2.4.1.-); anhydrosialidase (EC 4.2.2.15); Kdo hydrolase (EC 3.2.1.-); 2-keto-3-deoxynononic acid hydrolase / KDNase (EC 3.2.1.-)	GH	Glycoside Hydrolases
GH35	beta-galactosidase (EC 3.2.1.23); exo-beta-glucosaminidase (EC 3.2.1.165); exo-beta-1,4-galactanase (EC 3.2.1.-); beta-1,3-galactosidase (EC 3.2.1.-)	GH	Glycoside Hydrolases
GH36	alpha-galactosidase (EC 3.2.1.22); alpha-N-acetylgalactosaminidase (EC 3.2.1.49); stachyose synthase (EC 2.4.1.67); raffinose synthase (EC 2.4.1.82)	GH	Glycoside Hydrolases
GH37	alpha,alpha-trehalase (EC 3.2.1.28).	GH	Glycoside Hydrolases
GH38	alpha-mannosidase (EC 3.2.1.24); mannosyl-oligosaccharide alpha-1,2-mannosidase (EC 3.2.1.113); mannosyl-oligosaccharide alpha-1,3-1,6-mannosidase (EC 3.2.1.114); alpha-2-O-mannosylglycerate hydrolase (EC 3.2.1.170); mannosyl-oligosaccharide alpha-1,3-mannosidase (EC 3.2.1.-)	GH	Glycoside Hydrolases
GH39	alpha-L-iduronidase (EC 3.2.1.76); beta-xylosidase (EC 3.2.1.37).	GH	Glycoside Hydrolases
GH4	maltose-6-phosphate glucosidase (EC 3.2.1.122); alpha-glucosidase (EC 3.2.1.20); alpha-galactosidase (EC 3.2.1.22); 6-phospho-beta-glucosidase (EC 3.2.1.86); alpha-glucuronidase (EC 3.2.1.139); alpha-galacturonase (EC 3.2.1.67); palatinase (EC 3.2.1.-)	GH	Glycoside Hydrolases
GH42	beta-galactosidase (EC 3.2.1.23); alpha-L-arabinopyranosidase (EC 3.2.1.-)	GH	Glycoside Hydrolases
GH43	beta-xylosidase (EC 3.2.1.37); alpha-L-arabinofuranosidase (EC 3.2.1.55); xylanase (EC 3.2.1.8); alpha-1,2-L-arabinofuranosidase (EC 3.2.1.-); exo-alpha-1,5-L-arabinofuranosidase (EC 3.2.1.-); [inverting] exo-alpha-1,5-L-arabinanase (EC 3.2.1.-); beta-1,3-xylosidase (EC 3.2.1.-); [inverting] exo-alpha-1,5-L-arabinanase (EC 3.2.1.-); [inverting] endo-alpha-1,5-L-arabinanase (EC 3.2.1.99); exo-beta…	GH	Glycoside Hydrolases
GH43_1	GH43's subfamily	GH	Glycoside Hydrolases
GH43_10	GH43's subfamily	GH	Glycoside Hydrolases
GH43_11	GH43's subfamily	GH	Glycoside Hydrolases
GH43_12	GH43's subfamily	GH	Glycoside Hydrolases
GH43_13	GH43's subfamily	GH	Glycoside Hydrolases
GH43_14	GH43's subfamily	GH	Glycoside Hydrolases
GH43_16	GH43's subfamily	GH	Glycoside Hydrolases
GH43_17	GH43's subfamily	GH	Glycoside Hydrolases
GH43_18	GH43's subfamily	GH	Glycoside Hydrolases
GH43_19	GH43's subfamily	GH	Glycoside Hydrolases
GH43_2	GH43's subfamily	GH	Glycoside Hydrolases
GH43_20	GH43's subfamily	GH	Glycoside Hydrolases
GH43_22	GH43's subfamily	GH	Glycoside Hydrolases
GH43_24	GH43's subfamily	GH	Glycoside Hydrolases
GH43_26	GH43's subfamily	GH	Glycoside Hydrolases
GH43_27	GH43's subfamily	GH	Glycoside Hydrolases
GH43_28	GH43's subfamily	GH	Glycoside Hydrolases
GH43_29	GH43's subfamily	GH	Glycoside Hydrolases
GH43_3	GH43's subfamily	GH	Glycoside Hydrolases
GH43_31	GH43's subfamily	GH	Glycoside Hydrolases
GH43_32	GH43's subfamily	GH	Glycoside Hydrolases
GH43_33	GH43's subfamily	GH	Glycoside Hydrolases
GH43_34	GH43's subfamily	GH	Glycoside Hydrolases
GH43_35	GH43's subfamily	GH	Glycoside Hydrolases
GH43_36	GH43's subfamily	GH	Glycoside Hydrolases
GH43_37	GH43's subfamily	GH	Glycoside Hydrolases
GH43_4	GH43's subfamily	GH	Glycoside Hydrolases
GH43_5	GH43's subfamily	GH	Glycoside Hydrolases
GH43_7	GH43's subfamily	GH	Glycoside Hydrolases
GH43_8	GH43's subfamily	GH	Glycoside Hydrolases
GH43_9	GH43's subfamily	GH	Glycoside Hydrolases
GH44	endoglucanase (EC 3.2.1.4); xyloglucanase (EC 3.2.1.151)	GH	Glycoside Hydrolases
GH46	chitosanase (EC 3.2.1.132)	GH	Glycoside Hydrolases
GH47	alpha-mannosidase (EC 3.2.1.113)	GH	Glycoside Hydrolases
GH48	reducing end-acting cellobiohydrolase (EC 3.2.1.176); endo-beta-1,4-glucanase (EC 3.2.1.4); chitinase (EC 3.2.1.14)	GH	Glycoside Hydrolases
GH49	dextranase (EC 3.2.1.11); isopullulanase (EC 3.2.1.57); dextran 1,6-alpha-isomaltotriosidase (EC 3.2.1.95); sulfated arabinan endo-1,4-beta-L-arabinanase (EC 3.2.1.-)	GH	Glycoside Hydrolases
GH5	endo-beta-1,4-glucanase / cellulase (EC 3.2.1.4); endo-beta-1,4-xylanase (EC 3.2.1.8); beta-glucosidase (EC 3.2.1.21); beta-mannosidase (EC 3.2.1.25); beta-glucosylceramidase (EC 3.2.1.45); glucan beta-1,3-glucosidase (EC 3.2.1.58); licheninase (EC 3.2.1.73); exo-beta-1,4-glucanase / cellodextrinase (EC 3.2.1.74); glucan endo-1,6-beta-glucosidase (EC 3.2.1.75); mannan endo-beta-1,4-mannosidase (E…	GH	Glycoside Hydrolases
GH50	beta-agarase (EC 3.2.1.81).	GH	Glycoside Hydrolases
GH51	endoglucanase (EC 3.2.1.4); endo-beta-1,4-xylanase (EC 3.2.1.8); beta-xylosidase (EC 3.2.1.37); alpha-L-arabinofuranosidase (EC 3.2.1.55); lichenase / endo-beta-1,3-1,4-glucanase (EC 3.2.1.73)	GH	Glycoside Hydrolases
GH53	endo-beta-1,4-galactanase (EC 3.2.1.89).	GH	Glycoside Hydrolases
GH55	exo-beta-1,3-glucanase (EC 3.2.1.58); endo-beta-1,3-glucanase (EC 3.2.1.39)	GH	Glycoside Hydrolases
GH56	hyaluronidase (EC 3.2.1.35); chondroitin hydrolase (EC 3.2.1.-)	GH	Glycoside Hydrolases
GH57	alpha-amylase (EC 3.2.1.1); alpha-galactosidase (EC 3.2.1.22); amylopullulanase (EC 3.2.1.41); cyclomaltodextrinase (EC 3.2.1.54); branching enzyme (EC 2.4.1.18); 4-alpha-glucanotransferase (EC 2.4.1.25)	GH	Glycoside Hydrolases
GH59	beta-galactosidase (EC 3.2.1.23); galactocerebrosidase (EC 3.2.1.46)	GH	Glycoside Hydrolases
GH5_1	GH5's subfamily	GH	Glycoside Hydrolases
GH5_10	GH5's subfamily	GH	Glycoside Hydrolases
GH5_13	GH5's subfamily	GH	Glycoside Hydrolases
GH5_2	GH5's subfamily	GH	Glycoside Hydrolases
GH5_21	GH5's subfamily	GH	Glycoside Hydrolases
GH5_22	GH5's subfamily	GH	Glycoside Hydrolases
GH5_28	GH5's subfamily	GH	Glycoside Hydrolases
GH5_30	GH5's subfamily	GH	Glycoside Hydrolases
GH5_35	GH5's subfamily	GH	Glycoside Hydrolases
GH5_36	GH5's subfamily	GH	Glycoside Hydrolases
GH5_37	GH5's subfamily	GH	Glycoside Hydrolases
GH5_38	GH5's subfamily	GH	Glycoside Hydrolases
GH5_4	GH5's subfamily	GH	Glycoside Hydrolases
GH5_42	GH5's subfamily	GH	Glycoside Hydrolases
GH5_44	GH5's subfamily	GH	Glycoside Hydrolases
GH5_46	GH5's subfamily	GH	Glycoside Hydrolases
GH5_5	GH5's subfamily	GH	Glycoside Hydrolases
GH5_54	GH5's subfamily	GH	Glycoside Hydrolases
GH5_55	GH5's subfamily	GH	Glycoside Hydrolases
GH5_7	GH5's subfamily	GH	Glycoside Hydrolases
GH5_8	GH5's subfamily	GH	Glycoside Hydrolases
GH6	endoglucanase (EC 3.2.1.4); cellobiohydrolase (EC 3.2.1.91)	GH	Glycoside Hydrolases
GH63	processing alpha-glucosidase (EC 3.2.1.106); alpha-1,3-glucosidase (EC 3.2.1.84); alpha-glucosidase (EC 3.2.1.20); mannosylglycerate alpha-mannosidase / mannosylglycerate hydrolase (EC 3.2.1.170); glucosylglycerate hydrolase (EC 3.2.1.208)	GH	Glycoside Hydrolases
GH64	beta-1,3-glucanase (EC 3.2.1.39)	GH	Glycoside Hydrolases
GH65	alpha,alpha-trehalase (EC 3.2.1.28); maltose phosphorylase (EC 2.4.1.8); trehalose phosphorylase (EC 2.4.1.64); kojibiose phosphorylase (EC 2.4.1.230); trehalose-6-phosphate phosphorylase (EC 2.4.1.216); nigerose phosphorylase (EC 2.4.1.279); 3-O-alpha-glucopyranosyl-L-rhamnose phosphorylase (EC 2.4.1.282); 2-O-alpha-glucopyranosylglycerol: phosphate beta-glucosyltransferase (EC 2.4.1.-); alpha-g…	GH	Glycoside Hydrolases
GH66	cycloisomaltooligosaccharide glucanotransferase (EC 2.4.1.248); dextranase (EC 3.2.1.11).	GH	Glycoside Hydrolases
GH67	alpha-glucuronidase (EC 3.2.1.139); xylan alpha-1,2-glucuronidase (EC 3.2.1.131)	GH	Glycoside Hydrolases
GH68	levansucrase (EC 2.4.1.10); beta-fructofuranosidase (EC 3.2.1.26); inulosucrase (EC 2.4.1.9).	GH	Glycoside Hydrolases
GH70	dextransucrase (EC 2.4.1.5); alternansucrase (EC 2.4.1.140); reuteransucrase (EC 2.4.1.-); alpha-4,6-glucanotransferase (EC 2.4.1.-); alpha-1,2-branched dextransucrase (EC 2.4.1.-); alpha-4,3-glucanotransferase (EC 2.4.1.-)	GH	Glycoside Hydrolases
GH72	beta-1,3-glucanosyltransglycosylase (EC 2.4.1.-)	GH	Glycoside Hydrolases
GH73	lysozyme (EC 3.2.1.17); mannosyl-glycoprotein endo-beta-N-acetylglucosaminidase (EC 3.2.1.96); peptidoglycan hydrolase with endo-beta-N-acetylglucosaminidase specificity (EC 3.2.1.-)	GH	Glycoside Hydrolases
GH74	endoglucanase (EC 3.2.1.4); oligoxyloglucan reducing end-specific cellobiohydrolase (EC 3.2.1.150); xyloglucanase (EC 3.2.1.151)	GH	Glycoside Hydrolases
GH75	chitosanase (EC 3.2.1.132)	GH	Glycoside Hydrolases
GH76	alpha-1,6-mannanase (EC 3.2.1.101); alpha-glucosidase (EC 3.2.1.20)	GH	Glycoside Hydrolases
GH77	amylomaltase or 4-alpha-glucanotransferase (EC 2.4.1.25)	GH	Glycoside Hydrolases
GH78	alpha-L-rhamnosidase (EC 3.2.1.40); rhamnogalacturonan alpha-L-rhamnohydrolase (EC 3.2.1.174); L-Rhap-alpha-1,3-D-Apif -specific alpha-1,3-L-rhamnosidase (EC 3.2.1.-)	GH	Glycoside Hydrolases
GH79	beta-glucuronidase (EC 3.2.1.31); hyaluronoglucuronidase (EC 3.2.1.36); heparanase (EC 3.2.1.166); baicalin beta-glucuronidase (EC 3.2.1.167); beta-4-O-methyl-glucuronidase (EC 3.2.1.-)	GH	Glycoside Hydrolases
GH8	chitosanase (EC 3.2.1.132); cellulase (EC 3.2.1.4); licheninase (EC 3.2.1.73); endo-1,4-beta-xylanase (EC 3.2.1.8); reducing-end-xylose releasing exo-oligoxylanase (EC 3.2.1.156)	GH	Glycoside Hydrolases
GH81	endo-beta-1,3-glucanase (EC 3.2.1.39)	GH	Glycoside Hydrolases
GH82	Iota;-carrageenase (EC 3.2.1.157)	GH	Glycoside Hydrolases
GH84	N-acetyl beta-glucosaminidase (EC 3.2.1.52); hyaluronidase (EC 3.2.1.35); [protein]-3-O-(GlcNAc)-L-Ser/Thr beta-N-acetylglucosaminidase (EC 3.2.1.169)	GH	Glycoside Hydrolases
GH85	endo-beta-N-acetylglucosaminidase (EC 3.2.1.96)	GH	Glycoside Hydrolases
GH86	beta-agarase (EC 3.2.1.81); beta-porphyranase (EC 3.2.1.178)	GH	Glycoside Hydrolases
GH87	mycodextranase (EC 3.2.1.61); alpha-1,3-glucanase (EC 3.2.1.59)	GH	Glycoside Hydrolases
GH88	d-4,5-unsaturated beta-glucuronyl hydrolase (EC 3.2.1.-)	GH	Glycoside Hydrolases
GH89	alpha-N-acetylglucosaminidase (EC 3.2.1.50)	GH	Glycoside Hydrolases
GH9	endoglucanase (EC 3.2.1.4); endo-beta-1,3(4)-glucanase / lichenase-laminarinase (EC 3.2.1.6); beta-glucosidase (EC 3.2.1.21); lichenase / endo-beta-1,3-1,4-glucanase (EC 3.2.1.73); exo-beta-1,4-glucanase / cellodextrinase (EC 3.2.1.74); cellobiohydrolase (EC 3.2.1.91); xyloglucan-specific endo-beta-1,4-glucanase / endo-xyloglucanase (EC 3.2.1.151); exo-beta-glucosaminidase (EC 3.2.1.165)	GH	Glycoside Hydrolases
GH91	inulin lyase [DFA-I-forming] (EC 4.2.2.17); inulin lyase [DFA-III-forming] (EC 4.2.2.18); difructofuranose 1,2':2,3' dianhydride hydrolase [DFA-IIIase] (EC 3.2.1.-)	GH	Glycoside Hydrolases
GH92	mannosyl-oligosaccharide alpha-1,2-mannosidase (EC 3.2.1.113); mannosyl-oligosaccharide alpha-1,3-mannosidase (EC 3.2.1.-); mannosyl-oligosaccharide alpha-1,6-mannosidase (EC 3.2.1.-); alpha-mannosidase (EC 3.2.1.24); alpha-1,2-mannosidase (EC 3.2.1.-); alpha-1,3-mannosidase (EC 3.2.1.-); alpha-1,4-mannosidase (EC 3.2.1.-); mannosyl-1-phosphodiester alpha-1,P-mannosidase (EC 3.2.1.-)	GH	Glycoside Hydrolases
GH93	exo-alpha-L-1,5-arabinanase (EC 3.2.1.-)	GH	Glycoside Hydrolases
GH94	cellobiose phosphorylase (EC 2.4.1.20); laminaribiose phosphorylase (EC 2.4.1.31); cellodextrin phosphorylase (EC 2.4.1.49); chitobiose phosphorylase (EC 2.4.1.-); cyclic beta-1,2-glucan synthase (EC 2.4.1.-); cellobionic acid phosphorylase (EC 2.4.1.321); beta-1,2-oligoglucan phosphorylase (EC 2.4.1.-)	GH	Glycoside Hydrolases
GH95	alpha-L-fucosidase (EC 3.2.1.51); alpha-1,2-L-fucosidase (EC 3.2.1.63); alpha-L-galactosidase (EC 3.2.1.-)	GH	Glycoside Hydrolases
GH96	alpha-agarase (EC 3.2.1.158)	GH	Glycoside Hydrolases
GH97	glucoamylase (EC 3.2.1.3); alpha-glucosidase (EC 3.2.1.20); alpha-galactosidase (EC 3.2.1.22)	GH	Glycoside Hydrolases
GH98	blood-group endo-beta-1,4-galactosidase (EC 3.2.1.102); blood group A- and B-cleaving endo-beta-1,4-galactosidase (EC 3.2.1.-); endo-beta-1,4-xylanase (EC 3.2.1.8); endo-beta-1,4-xylanase (EC 3.2.1.8)	GH	Glycoside Hydrolases
GH99	glycoprotein endo-alpha-1,2-mannosidase (EC 3.2.1.130); mannan endo-1,2-alpha-mannanase (3.2.1.-)	GH	Glycoside Hydrolases
GT1	UDP-glucuronosyltransferase (EC 2.4.1.17); zeatin O-beta-xylosyltransferase (EC 2.4.2.40); 2-hydroxyacylsphingosine 1-beta-galactosyltransferase (EC 2.4.1.45); N-acylsphingosine galactosyltransferase (EC 2.4.1.47); flavonol 3-O-glucosyltransferase (EC 2.4.1.91); anthocyanidin 3-O-glucosyltransferase (EC 2.4.1.115); sinapate 1-glucosyltransferase (EC 2.4.1.120); indole-3-acetate beta-glucosyltrans…	GT	Glycosyl Transferases
GT10	galactoside alpha-1,3/1,4-L-fucosyltransferase (EC 2.4.1.65); galactoside alpha-1,3-L-fucosyltransferase (EC 2.4.1.152); glycoprotein alpha-1,3-L-fucosyltransferase (EC 2.4.1.214)	GT	Glycosyl Transferases
GT101	glucosyltransferase (EC 2.4.1.-)	GT	Glycosyl Transferases
GT102	dTDP-beta-L-Rhap : O-antigen-polysaccharide alpha-1,3-L-rhamnosyltransferase (EC 2.4.1.289)	GT	Glycosyl Transferases
GT104	dTDP-beta-L-Rhap : arginine alpha-L-rhamnosyltransferase (EC 2.4.1.-)	GT	Glycosyl Transferases
GT107	CMP-beta-KDO: beta-2,4-KDO transferase (EC 2.4.99.-); CMP-beta-KDO: beta-2,7-KDO transferase (EC 2.4.99.-)	GT	Glycosyl Transferases
GT11	GDP-L-Fuc: galactoside alpha-1,2-L-fucosyltransferase (EC 2.4.1.69); GDP-L-Fuc: beta-LacNac alpha-1,3-L-fucosyltransferase (EC 2.4.1.-)	GT	Glycosyl Transferases
GT12	[N-acetylneuraminyl]-galactosylglucosylceramide N-acetylgalactosaminyltransferase (EC 2.4.1.92).	GT	Glycosyl Transferases
GT13	alpha-1,3-mannosyl-glycoprotein beta-1,2-N-acetylglucosaminyltransferase (EC 2.4.1.101)	GT	Glycosyl Transferases
GT14	beta-1,3-galactosyl-O-glycosyl-glycoprotein beta-1,6-N-acetylglucosaminyltransferase (EC 2.4.1.102); N-acetyllactosaminide beta-1,6-N-acetylglucosaminyltransferase (EC 2.4.1.150); protein O-beta-xylosyltransferase (EC 2.4.2.26); UDP-GlcA:arabinogalactan beta-glucuronosyltransferase (EC 2.4.1.-)	GT	Glycosyl Transferases
GT16	alpha-1,6-mannosyl-glycoprotein beta-1,2-N-acetylglucosaminyltransferase (EC 2.4.1.143).	GT	Glycosyl Transferases
GT17	beta-1,4-mannosyl-glycoprotein beta-1,4-N-acetylglucosaminyltransferase (EC 2.4.1.144).	GT	Glycosyl Transferases
GT18	alpha-1,3(6)-mannosylglycoprotein beta-1,6-N-acetyl-glucosaminyltransferase (EC 2.4.1.155).	GT	Glycosyl Transferases
GT19	lipid-A-disaccharide synthase (EC 2.4.1.182).	GT	Glycosyl Transferases
GT20	alpha,alpha-trehalose-phosphate synthase [UDP-forming] (EC 2.4.1.15); Glucosylglycerol-phosphate synthase (EC 2.4.1.213); trehalose-6-P phosphatase (EC 3.1.3.12); [retaining] GDP-valeniol: validamine 7-phosphate valeniolyltransferase (EC 2.-.-.-)	GT	Glycosyl Transferases
GT21	UDP-Glc: ceramide beta-glucosyltransferase (EC 2.4.1.80).	GT	Glycosyl Transferases
GT22	Dol-P-Man: Man6GlcNAc2-PP-Dol alpha-1,2-mannosyltransferase (EC 2.4.1.259); Dol-P-Man: Man8GlcNAc2-PP-Dol alpha-1,2-mannosyltransferase (EC 2.4.1.261); Dol-P-Man: Man2-GlcNAc-phosphatidylinositol alpha-1,2-mannosyltransferase (EC 2.4.1.-); Dol-P-Man: Man3-GlcNAc-phosphatidylinositol alpha-1,2-mannosyltransferase (EC 2.4.1.-)	GT	Glycosyl Transferases
GT23	N-acetyl-beta-D-glucosaminide alpha-1,6-L-fucosyltransferase (EC 2.4.1.68); chitin-oligosaccharide alpha-1,6-L-fucosyltransferase (EC 2.4.1.-)	GT	Glycosyl Transferases
GT24	UDP-Glc: glycoprotein alpha-glucosyltransferase (EC 2.4.1.-).	GT	Glycosyl Transferases
GT25	lipopolysaccharide beta-1,4-galactosyltransferase (EC 2.4.1.-); beta-1,3-glucosyltransferase (EC 2.4.1.-); beta-1,2-glucosyltransferase (EC 2.4.1.-); beta-1,2-galactosyltransferase (EC 2.4.1.-); LPS beta-1,4-galactosyltransferase (EC 2.4.1.-); occidiofungin beta-xylosyltransferase (EC 2.4.2.-); UDP-Gal:procollagen beta-galactosyltransferase (EC 2.4.1.50)	GT	Glycosyl Transferases
GT26	UDP-ManNAcA: beta-N-acetyl mannosaminuronyltransferase (EC 2.4.1.-); UDP-ManNAc: beta-N-acetyl-mannosaminyltransferase (EC 2.4.1.-); UDP-Glc: beta-1,4-glucosyltransferase (EC 2.4.1.-); beta-1,4-galactosyltransferase (EC 2.4.1.-)	GT	Glycosyl Transferases
GT27	polypeptide alpha-N-acetylgalactosaminyltransferase (EC 2.4.1.41)	GT	Glycosyl Transferases
GT28	1,2-diacylglycerol 3-beta-galactosyltransferase (EC 2.4.1.46); 1,2-diacylglycerol 3-beta-glucosyltransferase (EC 2.4.1.157); UDP-GlcNAc: Und-PP-MurAc-pentapeptide beta-N-acetylglucosaminyltransferase (EC 2.4.1.227); digalactosyldiacylglycerol synthase (EC 2.4.1.241)	GT	Glycosyl Transferases
GT29	sialyltransferase (EC 2.4.99.-); beta-galactoside alpha-2,6-sialyltransferase (EC 2.4.99.1); alpha-N-acetylgalactosaminide alpha-2,6-sialyltransferase (EC 2.4.99.3); beta-galactoside alpha-2,3-sialyltransferase (EC 2.4.99.4); N-acetyllactosaminide alpha-2,3-sialyltransferase (EC 2.4.99.6); (alpha-N-acetyl-neuraminyl-2,3-beta-galactosyl-1,3)-N-acetylgalactosaminide alpha-2,6-sialyltransferase (EC …	GT	Glycosyl Transferases
GT2_Chitin_synth_1	GT2's subfamily	GT	Glycosyl Transferases
GT2_Chitin_synth_2	GT2's subfamily	GT	Glycosyl Transferases
GT2_Glyco_tranf_2_2	GT2's subfamily	GT	Glycosyl Transferases
GT2_Glyco_tranf_2_3	GT2's subfamily	GT	Glycosyl Transferases
GT2_Glyco_tranf_2_4	GT2's subfamily	GT	Glycosyl Transferases
GT2_Glyco_tranf_2_5	GT2's subfamily	GT	Glycosyl Transferases
GT2_Glyco_trans_2_3	GT2's subfamily	GT	Glycosyl Transferases
GT2_Glycos_transf_2	GT2's subfamily	GT	Glycosyl Transferases
GT3	glycogen synthase (EC 2.4.1.11).	GT	Glycosyl Transferases
GT30	CMP-beta-KDO: alpha-3-deoxy-D-manno-octulosonic-acid (KDO) transferase (EC 2.4.99.-).	GT	Glycosyl Transferases
GT31	N-acetyllactosaminide beta-1,3-N-acetylglucosaminyltransferase (EC 2.4.1.149); Glycoprotein-N-acetylgalactosamine 3-beta-galactosyltransferase (EC 2.4.1.122); fucose-specific beta-1,3-N-acetylglucosaminyltransferase (EC 2.4.1.-); globotriosylceramide beta-1,3-GalNAc transferase (EC 2.4.1.79); chondroitin synthase (beta-1,3-GlcUA and beta-1,4-GalNAc transferase (EC 2.4.1.175); chondroitin beta-1,3…	GT	Glycosyl Transferases
GT32	alpha-1,6-mannosyltransferase (EC 2.4.1.-); alpha-1,4-N-acetylglucosaminyltransferase (EC 2.4.1.-); alpha-1,4-N-acetylgalactosaminyltransferase (EC 2.4.1.-); GDP-Man: inositol-phosphorylceramide transferase (EC 2.4.1.-); UDP-Gal: beta-galactoside alpha-1,4-galactosyltransferase (EC 2.4.1.-); UDP-Gal: lactose/N-acetyl-lactosamine alpha-1,4-galactosyltransferase (EC 2.4.1.-); UDP-Glc: protein alpha…	GT	Glycosyl Transferases
GT33	GDP-Man: chitobiosyldiphosphodolichol beta-mannosyltransferase (EC 2.4.1.142).	GT	Glycosyl Transferases
GT35	glycogen or starch phosphorylase (EC 2.4.1.1).	GT	Glycosyl Transferases
GT37	galactoside 2-L-fucosyltransferase (EC 2.4.1.69)	GT	Glycosyl Transferases
GT38	polysialyltransferase (EC 2.4.-.-)	GT	Glycosyl Transferases
GT39	Dol-P-Man: protein alpha-mannosyltransferase (EC 2.4.1.109)	GT	Glycosyl Transferases
GT4	sucrose synthase (EC 2.4.1.13); sucrose-phosphate synthase (EC 2.4.1.14); alpha-glucosyltransferase (EC 2.4.1.52); lipopolysaccharide N-acetylglucosaminyltransferase (EC 2.4.1.56); phosphatidylinositol alpha-mannosyltransferase (EC 2.4.1.57); GDP-Man: Man1GlcNAc2-PP-dolichol alpha-1,3-mannosyltransferase (EC 2.4.1.132); GDP-Man: Man3GlcNAc2-PP-dolichol/Man4GlcNAc2-PP-dolichol alpha-1,2-mannosyltr…	GT	Glycosyl Transferases
GT40	beta-1,3-galactofuranosyltransferases (EC 2.4.1.-)	GT	Glycosyl Transferases
GT41	UDP-GlcNAc: peptide beta-N-acetylglucosaminyltransferase (EC 2.4.1.255); UDP-Glc: peptide N-beta-glucosyltransferase (EC 2.4.1.-)	GT	Glycosyl Transferases
GT42	CMP-NeuAc alpha-2,3-sialyltransferase (EC 2.4.99.-)	GT	Glycosyl Transferases
GT43	beta-glucuronyltransferase (EC 2.4.1.135); UDP-Xyl: xylan beta-1,4-xylosyltransferase (EC 2.4.2.-)	GT	Glycosyl Transferases
GT45	alpha-N-acteylglucosaminyltransferase (EC 2.4.1.-)	GT	Glycosyl Transferases
GT46	Deleted	GT	Glycosyl Transferases
GT47	heparan beta-glucuronyltransferase (EC 2.4.1.225); xyloglucan beta-galactosyltransferase (EC 2.4.1.-); heparan synthase (EC 2.4.1.-); arabinan alpha-L-arabinosyltransferase (EC 2.4.2.-).	GT	Glycosyl Transferases
GT49	beta-1,3-N-acetylglucosaminyltransferase (EC 2.4.1.-).	GT	Glycosyl Transferases
GT5	UDP-Glc: glycogen glucosyltransferase (EC 2.4.1.11); ADP-Glc: starch glucosyltransferase (EC 2.4.1.21); NDP-Glc: starch glucosyltransferase (EC 2.4.1.242); UDP-Glc: alpha-1,3-glucan synthase (EC 2.4.1.183) UDP-Glc: alpha-1,4-glucan synthase (EC 2.4.1.-)	GT	Glycosyl Transferases
GT51	murein polymerase (EC 2.4.1.129).	GT	Glycosyl Transferases
GT53	UDP-L-Ara: alpha-L-arabinosyltransferase (EC 2.4.2.-)	GT	Glycosyl Transferases
GT54	UDP-GlcNAc: alpha-1,3-D-mannoside beta-1,4-N-acetylglucosaminyltransferase (EC 2.4.1.145)	GT	Glycosyl Transferases
GT56	TDP-Fuc4NAc: lipid II Fuc4NAc transferase (EC 2.4.1.-)	GT	Glycosyl Transferases
GT57	Dol-P-Glc: alpha-1,3-glucosyltransferase (EC 2.4.1.-)	GT	Glycosyl Transferases
GT58	Dol-P-Man: Man5GlcNAc2-PP-Dol alpha-1,3-mannosyltransferase (EC 2.4.1.258)	GT	Glycosyl Transferases
GT59	Dol-P-Glc: Glc2Man9GlcNAc2-PP-Dol alpha-1,2-glucosyltransferase (EC 2.4.1.256)	GT	Glycosyl Transferases
GT6	alpha-1,3-galactosyltransferase (EC 2.4.1.87); alpha-1,3 N-acetylgalactosaminyltransferase (EC 2.4.1.40); alpha-galactosyltransferase (EC 2.4.1.37); globoside alpha-N-acetylgalactosaminyltransferase (EC 2.4.1.88).	GT	Glycosyl Transferases
GT60	UDP-GlcNAc: polypeptide alpha-N-acetylglucosaminyltransferase (EC 2.4.1.-); UDP-GlcNAc: hydroxyproline polypeptide alpha-N-acetylglucosaminyltransferase (EC 2.4.1.-)	GT	Glycosyl Transferases
GT61	beta-1,2-xylosyltransferase (EC 2.4.2.38) ; protein O-beta-N-acetylglucosaminyltransferase (EC 2.4.1.94) ; xylan alpha-1,3-arabinofuranosyltransferase (EC 2.4.2.-) ;	GT	Glycosyl Transferases
GT62	alpha-1,2-mannosyltransferase (EC 2.4.1.-); alpha-1,6-mannosyltransferase (EC 2.4.1.-)	GT	Glycosyl Transferases
GT63	UDP-Glc: DNA beta-glucosyltransferase (EC 2.4.1.27)	GT	Glycosyl Transferases
GT64	UDP-GlcNAc: heparan alpha-N-acetylhexosaminyltransferase (EC 2.4.1.224)	GT	Glycosyl Transferases
GT66	dolichyl-diphosphooligosaccharidea protein glycotransferase (EC 2.4.99.18); undecaprenyl-diphosphooligosaccharidea protein glycotransferase (EC 2.4.99.19)	GT	Glycosyl Transferases
GT68	GDP-Fuc: protein O-alpha-fucosyltransferase (EC 2.4.1.-)	GT	Glycosyl Transferases
GT7	lactose synthase (EC 2.4.1.22); beta-N-acetylglucosaminyl-glycopeptide beta-1,4-galactosyltransferase (EC 2.4.1.38); N-acetyllactosamine synthase (EC 2.4.1.90); xylosylprotein beta-4-galactosyltransferase (EC 2.4.1.133); UDP-Gal: neolactotriaosylceramide beta-1,4-galactosyltransferase (EC 2.4.1.275); beta-1,4-N-acetylglucosaminyltransferase (EC 2.4.1.-)	GT	Glycosyl Transferases
GT70	UDP-GlcA: beta-glucuronosyltransferase (EC 2.4.1.17)	GT	Glycosyl Transferases
GT73	CMP-beta-KDO: alpha-3-deoxy-D-manno-octulosonic-acid (KDO) transferase (EC 2.4.99.-).	GT	Glycosyl Transferases
GT74	alpha-1,2-L-fucosyltransferase (EC 2.4.1.69)	GT	Glycosyl Transferases
GT76	Dol-P-Man: alpha-1,6-mannosyltransferase (EC 2.4.1.-)	GT	Glycosyl Transferases
GT8	lipopolysaccharide alpha-1,3-galactosyltransferase (EC 2.4.1.44); UDP-Glc: (glucosyl)lipopolysaccharide alpha-1,2-glucosyltransferase (EC 2.4.1.-); lipopolysaccharide glucosyltransferase 1 (EC 2.4.1.58); glycogenin glucosyltransferase (EC 2.4.1.186); inositol 1-alpha-galactosyltransferase (galactinol synthase) (EC 2.4.1.123); homogalacturonan alpha-1,4-galacturonosyltransferase (EC 2.4.1.43); UDP…	GT	Glycosyl Transferases
GT80	beta-galactoside alpha-2,6-sialyltransferase (EC 2.4.99.1); beta-galactoside alpha-2,3-sialyltransferase (EC 2.4.99.4)	GT	Glycosyl Transferases
GT81	NDP-Glc: glucosyl-3-phosphoglycerate synthase (EC 2.4.1.-); NDP-Man: mannosyl-3-phosphoglycerate synthase (EC 2.4.1.-);	GT	Glycosyl Transferases
GT82	UDP-GalNAc: beta-1,4-N-acetylgalactosaminyltransferase (EC 2.4.1.-)	GT	Glycosyl Transferases
GT83	undecaprenyl phosphate-alpha-L-Ara4N: 4-amino-4-deoxy-beta-L-arabinosyltransferase (EC 2.4.2.43); dodecaprenyl phosphate-beta-galacturonic acid: lipopolysaccharide core alpha-galacturonosyl transferase (EC 2.4.1.-)	GT	Glycosyl Transferases
GT84	cyclic beta-1,2-glucan synthase (EC 2.4.1.-);	GT	Glycosyl Transferases
GT85	beta-D-arabinofuranosyl monophosphoryldecaprenol: galactan alpha-D-arabinofuranosyltransferase (EC 2.4.2.-)	GT	Glycosyl Transferases
GT87	polyprenol-P-Man: alpha-1,2-mannosyltransferase (EC 2.4.1.-)	GT	Glycosyl Transferases
GT89	beta-D-arabinofuranosyl-1-monophosphoryldecaprenol : arabinan beta-1,2-arabinofuranosyltransferase (EC 2.4.2.-)	GT	Glycosyl Transferases
GT9	lipopolysaccharide N-acetylglucosaminyltransferase (EC 2.4.1.56); heptosyltransferase (EC 2.4.-.-).	GT	Glycosyl Transferases
GT90	UDP-Xyl: (mannosyl) glucuronoxylomannan/galactoxylomannan beta-1,2-xylosyltransferase (EC 2.4.2.-); UDP-Glc: protein O-beta-glucosyltransferase (EC 2.4.1.-); UDP-Xyl: protein O-beta-xylosyltransferase (EC 2.4.2.-)	GT	Glycosyl Transferases
GT92	UDP-Gal: N-glycan core alpha-1,6-fucoside beta-1,4-galactosyltransferase (EC 2.4.1.-); UDP-Gal: beta-galactoside beta-1,4-galactosyltransferase (EC 2.4.1.-)	GT	Glycosyl Transferases
GT94	GDP-Man: GlcA-beta-1,2-Man-alpha-1,3-Glc-beta-1,4-Glc-alpha-1-PP-undecaprenol beta-1,4-mannosyltransferase (2.4.1.251)	GT	Glycosyl Transferases
GT97	CMP-Neu5Ac:alpha-galactoside alpha-2,6-sialyltransferase (EC 2.4.99.-); CMP-Neu5Ac:alpha-glucoside alpha-2,6-sialyltransferase (EC 2.4.99.-);	GT	Glycosyl Transferases
GT98	Dol-P-Man : protein [tryptophan] alpha-C-mannosyltransferase (EC 2.4.1.-)	GT	Glycosyl Transferases
GT99	CMP-beta-KDO 3-deoxy-beta-D-manno-oct-2-ulosonic acid transferase (EC 2.4.99.-)	GT	Glycosyl Transferases
PL1	pectate lyase (EC 4.2.2.2); exo-pectate lyase (EC 4.2.2.9); pectin lyase (EC 4.2.2.10).	PL	Polysaccharide Lyases
PL10	pectate lyase (EC 4.2.2.2)	PL	Polysaccharide Lyases
PL10_1	PL10's subfamily	PL	Polysaccharide Lyases
PL10_2	PL10's subfamily	PL	Polysaccharide Lyases
PL11	rhamnogalacturonan endolyase (EC 4.2.2.23); rhamnogalacturonan exolyase (EC 4.2.2.24)	PL	Polysaccharide Lyases
PL11_1	PL11's subfamily	PL	Polysaccharide Lyases
PL11_2	PL11's subfamily	PL	Polysaccharide Lyases
PL12	heparin-sulfate lyase (EC 4.2.2.8)	PL	Polysaccharide Lyases
PL12_1	PL12's subfamily	PL	Polysaccharide Lyases
PL12_2	PL12's subfamily	PL	Polysaccharide Lyases
PL12_3	PL12's subfamily	PL	Polysaccharide Lyases
PL13	heparin lyase (EC 4.2.2.7)	PL	Polysaccharide Lyases
PL15	oligo-alginate lyase (EC 4.2.2.-); alginate lyase (EC 4.2.2.3)	PL	Polysaccharide Lyases
PL15_1	PL15's subfamily	PL	Polysaccharide Lyases
PL17	alginate lyase (EC 4.2.2.3); oligoalginate lyase (EC 4.2.2.26)	PL	Polysaccharide Lyases
PL1_2	PL1's subfamily	PL	Polysaccharide Lyases
PL1_5	PL1's subfamily	PL	Polysaccharide Lyases
PL1_8	PL1's subfamily	PL	Polysaccharide Lyases
PL1_9	PL1's subfamily	PL	Polysaccharide Lyases
PL20	endo-beta-1,4-glucuronan lyase (EC 4.2.2.14)	PL	Polysaccharide Lyases
PL22	oligogalacturonate lyase / oligogalacturonide lyase (EC 4.2.2.6)	PL	Polysaccharide Lyases
PL22_1	PL22's subfamily	PL	Polysaccharide Lyases
PL22_2	PL22's subfamily	PL	Polysaccharide Lyases
PL25	ulvan lyase (EC 4.2.2.-).	PL	Polysaccharide Lyases
PL26	rhamnogalacturonan exolyase (EC 4.2.2.24).	PL	Polysaccharide Lyases
PL27	L-rhamnose-alpha-1,4-D-glucuronate lyase (EC 4.2.2.-)	PL	Polysaccharide Lyases
PL29	hyaluronate lyase (EC 4.2.2.1); chondroitin-sulfate ABC endolyase (EC 4.2.2.20); dermatan sulfate lyase (4.2.2.-); dermatan sulfate lyase (EC 4.2.2.-)	PL	Polysaccharide Lyases
PL30	hyaluronate lyase (EC 4.2.2.1)	PL	Polysaccharide Lyases
PL31	endo-beta-1,4-glucuronan lyase (EC 4.2.2.14)	PL	Polysaccharide Lyases
PL32	poly(beta-mannuronate) lyase / M-specific alginate lyase (EC 4.2.2.3)	PL	Polysaccharide Lyases
PL33_1	PL33's subfamily	PL	Polysaccharide Lyases
PL33_2	PL33's subfamily	PL	Polysaccharide Lyases
PL34	alginate lyase (EC 4.2.2.-)	PL	Polysaccharide Lyases
PL35	chondroitin lyase / chondroitinase (EC 4.2.2.-); chondroitin AC lyase (EC 4.2.2.5)	PL	Polysaccharide Lyases
PL37	chondroitin-sulfate ABC endolyase (EC 4.2.2.20); heparin-sulfate lyase / heparin lyase III (EC 4.2.2.8); ulvan lyase (EC 4.2.2.-)	PL	Polysaccharide Lyases
PL3_1	PL3's subfamily	PL	Polysaccharide Lyases
PL4	rhamnogalacturonan endolyase (EC 4.2.2.23).	PL	Polysaccharide Lyases
PL4_2	PL4's subfamily	PL	Polysaccharide Lyases
PL4_4	PL4's subfamily	PL	Polysaccharide Lyases
PL5	alginate lyase (EC 4.2.2.3).	PL	Polysaccharide Lyases
PL6	alginate lyase (EC 4.2.2.3); chondroitinase B (EC 4.2.2.19); MG-specific alginate lyase (EC 4.2.2.-); poly(alpha-L-guluronate) lyase / G-specific alginate lyase (EC 4.2.2.11);	PL	Polysaccharide Lyases
PL6_1	PL6's subfamily	PL	Polysaccharide Lyases
PL6_2	PL6's subfamily	PL	Polysaccharide Lyases
PL8	hyaluronate lyase (EC 4.2.2.1); chondroitin AC lyase (EC 4.2.2.5); xanthan lyase (EC 4.2.2.12); chondroitin ABC lyase (EC 4.2.2.20)	PL	Polysaccharide Lyases
PL8_2	PL8's subfamily	PL	Polysaccharide Lyases
PL8_3	PL8's subfamily	PL	Polysaccharide Lyases
PL9	pectate lyase (EC 4.2.2.2); exopolygalacturonate lyase (EC 4.2.2.9); thiopeptidoglycan lyase (EC 4.2.2.-).	PL	Polysaccharide Lyases
PL9_1	PL9's subfamily	PL	Polysaccharide Lyases
PL9_2	PL9's subfamily	PL	Polysaccharide Lyases
PL9_4	PL9's subfamily	PL	Polysaccharide Lyases
